# Supplementary material for: A metal–organic framework material that functions as an enantioselective catalyst for olefin epoxidation
Source: Royal Society of Chemistry journal article supplement (doi:10.1039/b600408c), 2006-01-01
Supplement: b600408c.pdf [file b600408c.pdf]

## A metal-organic framework material that functions as an enantioselective catalyst for olefin epoxidation

So-Hye Cho,<sup>a</sup> Baoqing Ma,<sup>a</sup> S. T. Nguyen,<sup>\*a</sup> Joseph T. Hupp<sup>\*a</sup> and Thomas E. Albrecht-Schmitt<sup>b</sup>

<sup>a</sup>Department of Chemistry and the Institute of Environmental Catalysis, Northwestern University, 2145 Sheridan Road, Evanston, IL 60208-3113, USA.  
E-mail: stn@northwestern.edu; j-hupp@northwestern.edu

<sup>b</sup>Department of Chemistry and Biochemistry, Auburn University, AL 36830

**Materials.** Dichloromethane, dimethylformamide, and 1,4-biphenyldicarboxylic acid (**H<sub>2</sub>bpdc**) were purchased from the Aldrich Chemical Company and used without further purification. Chloroform was distilled over calcium hydride and kept in a straus flask. 2-(*Tert*-butylsulfonyl)iodosylbenzene,<sup>1</sup> 2,2-dimethyl-2*H*-chromene,<sup>2</sup> 2,2-dimethyl-3,4-epoxychroman,<sup>3</sup> (*R,R*)-(-)-1,2-cyclohexanediamino-*N,N'*-bis(3-*tert*-butyl-5-(4-pyridyl)-salicylidene)Mn<sup>III</sup>Cl (**L**),<sup>4</sup> and dihydroxo-5,10,15,20-tetraphenylporphyrinatotin<sup>IV</sup> (Sn(TPP)(OH)<sub>2</sub>)<sup>5</sup> were synthesized according to literature procedures.

**Characterization.** Elemental analyses were performed by Atlantic Microlabs, Inc. (Norcross, GA). Powder X-ray diffraction patterns were recorded with a Rigaku XDS 2000 diffractometer using nickel-filtered Cu K $\alpha$  radiation ( $\lambda = 1.5418 \text{ \AA}$ ) over a range of  $5^\circ < 2\theta < 30^\circ$  in  $0.1^\circ$  steps with a 2-s counting time per step. ICP spectroscopy was conducted on a Thermo Jarrell Ash Atomscan Model 25 Sequential ICP spectrometer that is equipped with vacuum optics covering the spectral range from 160 to 850 nm. <sup>1</sup>H NMR and <sup>13</sup>C NMR spectra were recorded on a Varian INOVA 500 NMR spectrometer (500 MHz for <sup>1</sup>H NMR). NMR chemical shifts are reported in ppm against residual solvent resonance as the internal standard ( $\delta(\text{CHCl}_3) = 7.27 \text{ ppm}$ ). <sup>1</sup>H NMR data are reported as follows: chemical shift (multiplicity (s = singlet, d = doublet, t = triplet, q = quartet, and m = multiplet), integration, assignment). Gas Chromatography/Mass Spectrometry (GC/MS) analyses were performed on a Hewlett-Packard 6890 GC/MSD interfaced to a HP 5972 Mass Selective Detector Quadrupole Mass Spectrometer. Electrospray-ionization mass spectrometry (ESIMS) was conducted on a Micromass Quattro II triple quadrupole HPLC/MS/MS mass spectrometer. UV-Vis spectra were obtained on a Varian Cary 500 spectrophotometer.

Quantitative analyses of 2,2-dimethyl-2*H*-chromene epoxidation were carried out on an HP 6890A gas chromatograph equipped with a FID detector and ChemStation software. The column used was a 30-m HP-5 (Crosslinked 5% PH ME Siloxane) capillary column with 0.32-mm inner diameter and 0.25- $\mu\text{m}$  film thickness. Calibration curves were produced using analytically pure samples prepared and characterized by literature methods.<sup>3</sup> Product concentrations were determined with combined area of the epoxide and the ketone relative to undecane internal standard (approximately 30% of epoxide products were isomerized to ketone under the GC condition). Column head pressure was 9.3 psi. The column temperature was ramped from 80 to 250 °C at a rate of 5 °C/min. The retention time of the epoxide was 12.5 min and that of the ketone was 11.5 min. For determination of enantiomeric excess, a Supelco  $\beta$ -DEX 120 column was used on an HP 6890 gas chromatograph equipped with an FID detector and ChemStation software. Column head pressure was 23 psi. The column temperature was ramped from 140 to 175 °C at a rate of 1 °C/min and held at 175 °C for 20 min. The retention time of the first isomer [(3*R*,4*R*), minor] was 17.5 min and that of the second isomer [(3*S*,4*S*), major] was 18.5 min.

**Single crystal X-ray structure determination.** A brown block single crystal of **1** was coated with paraffin and mounted on a Bruker SMART CCD 1000 diffractometer equipped with a graphite-monochromated Mo K $\alpha$  ( $\lambda = 0.71073 \text{ \AA}$ ) radiation source in a cold nitrogen stream. All crystallographic data were corrected for Lorentz and polarization effects (SAINT) as well as face-index absorption. The structure was solved by direct methods and refined by the full-matrix least-squares method on  $F^2$  with appropriate software implemented in the SHELXTL program package. The refinement was constrained to fit the *R,R* structure. All the non-hydrogen atoms were refined anisotropically. Hydrogen atoms were added at their geometrically ideal positions. One of the Mn atoms and its corresponding Cl atom are disordered over two positions. One coordinated DMF molecule can be reasonably modeled, while the other one cannot. Most of the DMF solvent molecules are severely disordered, which hindered satisfactory development of the model; therefore, the SQUEEZE routine (PLATON) was applied to remove the contributions of electron density from disordered solvent molecules.

**(5,10,15,20-Tetraphenylporphyrinato)tin<sup>IV</sup> bis(4-vinyl benzoate) (Sn(TPP)(OCOC<sub>6</sub>H<sub>4</sub>-*p*-CH=CH<sub>2</sub>)<sub>2</sub>) (2).** Under a nitrogen atmosphere, Sn(TPP)(OH)<sub>2</sub> (236 mg, 0.309 mmol) and 4-vinyl benzoic acid (91.6 mg, 0.618 mmol) were added to a 50-mL round-bottom flask equipped with a magnetic stir bar. To this mixture were added dry CHCl<sub>3</sub> (20 mL). The mixture was stirred under nitrogen for 12 h at RT. The resulting solution was filtered through anhydrous MgSO<sub>4</sub> and evaporated to dryness *in vacuo* to give a bright purple solid (282 mg, 86%). <sup>1</sup>H NMR (500 MHz, CDCl<sub>3</sub>):  $\delta$  9.10 (m, 8H,  $\beta$ -pyrrole), 8.28 (m, 8H, *ortho*-ArH), 7.82 (m, 12H, *meta,para*-ArH), 6.37 (dd, 4H,  $J_1 = 8.2 \text{ Hz}$ ,  $J_2 = 9.7 \text{ Hz}$ , 3' and 5'ArH), 6.22 (m, 2H, CH=CH<sub>2</sub>), 5.34 (m, 2H, CH=CH<sub>2</sub>), 4.97 (d, 2H,  $J = 11 \text{ Hz}$ , CH=CH<sub>2</sub>), 4.84 (dd, 4H,  $J_1 = 8.2 \text{ Hz}$ ,  $J_2 = 26 \text{ Hz}$ , 2' and 6'ArH). UV-Vis (CH<sub>2</sub>Cl<sub>2</sub>):  $\lambda_{\text{max}}$  nm (log  $\epsilon$ ): 424 (5.79), 518 (3.50), 560 (4.33), 600 (3.98). ESIMS: Exact mass calcd. for [C<sub>62</sub>H<sub>42</sub>N<sub>4</sub>O<sub>4</sub>Sn + H]<sup>+</sup>: 1027.2. Found: 1027.9.

**Ethyl 4-vinyl benzoate (3).** Under a nitrogen atmosphere, 4-vinyl benzoic acid (1.00 g, 6.75 mmol), 1,3-dicyclohexyl-carbodiimide (1.67 g, 8.10 mmol), and 4-dimethylaminopyridine (82.5 mg, 0.675 mmol) were added to a 100-mL round-bottom flask equipped with a magnetic stir bar. To this mixture were added CH<sub>2</sub>Cl<sub>2</sub> (50 mL) and EtOH (2.90 g, 67.5 mmol). The resulting solution was stirred under nitrogen for 12 h at RT, filtered through a Celite pad, and evaporated to near dryness under vacuum. Chromatography of the crude product on silica (Hexane:EtOAc=30:1), followed by concentration gave a colorless oil (1.03 g, 87%). <sup>1</sup>H NMR (500 MHz, CDCl<sub>3</sub>):  $\delta$  8.01 (d,

2H,  $J = 8.5$  Hz, ArH), 7.47 (d, 2H,  $J = 8.0$  Hz, ArH), 6.76 (dd, 1H,  $J_1 = 11$  Hz,  $J_2 = 18$  Hz, CH=CH<sub>2</sub>), 5.87 (d, 1H,  $J = 18$  Hz, CH=CH<sub>2</sub>), 5.39 (d, 1H,  $J = 11$  Hz, CH=CH<sub>2</sub>), 4.38 (q, 2H,  $J = 7.5$  Hz, CH<sub>2</sub>CH<sub>3</sub>), 1.405 (t, 3H,  $J = 7.0$  Hz, CH<sub>2</sub>CH<sub>3</sub>). GC-MS(EI):  $m/z$  (%): 176 (23) [M<sup>+</sup>], 148 (30), 131 (100), 103 (29), 77 (25).

**General procedure for recycling study of 1.** To a conical vial were added 2,2-dimethyl-2H-chromene (320 mg,  $2.0 \times 10^{-3}$  mol), undecane (19.1 mg), and dichloromethane (1 mL). **1** crystals (1.1 mg, containing  $5.0 \times 10^{-7}$  mol of **L**) were placed in the vial along with a micro stir bar. The oxidant, 2-(*tert*-butylsulfonyl)iodosylbenzene (170 mg,  $5 \times 10^{-4}$  mmol), was added to the solution to start the reaction. The same amount of the oxidant was added once more after 1 h. After 2-h vigorous stirring, the mixture was centrifuged on a Hermle Z230MA centrifuge at 12,000 rpm for 5 minutes. The supernatant solution was decanted and the remaining solid was washed with acetone ( $2 \times 2$  mL) followed by dichloromethane ( $2 \times 2$  mL). The solid was dried in air prior to being reused.

**ICP spectrometric evaluation of manganese and zinc loss.** In a typical procedure, the post-reaction supernatant solution was centrifuged, combined with acetone and dichloromethane washes, and passed through a Celite pad. The solvent was removed under reduced pressure and unreacted substrates and products were separated using a Kugelrohr distillation apparatus (Buchi). The remaining solid mixture was treated with conc. sulfuric acid (0.5 mL) to give a black viscous solution which was then heated to dryness.<sup>6</sup> To the resulting black solid was added hydrochloric and nitric acid (5.0 mL, 3/1 : v/v), and the whole mixture was heated at 120 °C until the total volume reached the 1-mL mark. The colorless solution was diluted volumetrically with doubly distilled water (a resistivity of 18 MΩ) to 10 mL, which was then evaluated by inductively coupled plasma (ICP) spectroscopy for Mn and Zn contents. The Mn and Zn contents were measured in ppm based on calibration curves obtained with a series of solution doped with different amount of Mn and Zn calibration standard solutions. The quantity of Mn lost from **1** after one cycle was calculated to be 0.020-0.035 μmol (4-7% of total Mn) and that of Zn was calculated to be 0.018-0.029 μmol (2-3% of total Zn).

**General procedure for competitive substrate selectivity studies.** To a Knotes brand thread NMR tube were added Sn(TPP)(OCOC<sub>6</sub>H<sub>4</sub>-*p*-CH=CH<sub>2</sub>)<sub>2</sub> (19.4 mg, 18.9 μmol), ethyl 4-vinyl benzoate (6.65 mg, 37.8 μmol), and **1** (0.42 mg, 0.189 μmol). The mixture was dissolved in CDCl<sub>3</sub> (1.0 mL) and the reaction was started by addition of 2-(*tert*-butylsulfonyl)iodosylbenzene (3.2 mg, 9.45 μmol). For a comparison, a solution with **L** (0.12 mg, 0.189 μmol) instead of **1** was set up in the same manner. The reaction was monitored by <sup>1</sup>H NMR for yield of each product (the epoxide peak of Sn(TPP)di-oxyranilbenzoate at δ 3.29 versus the epoxide peak of 4-oxyranil benzoic acid ethyl ester at δ 3.82 which were integrated against β-pyrrole peak at δ 9.10).

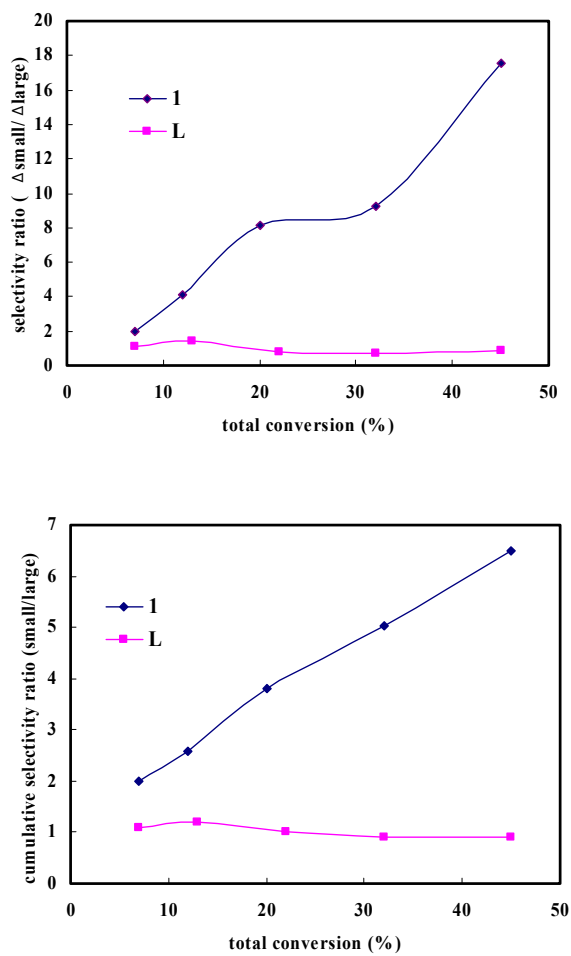

**Fig. S1** Plots showing selectivity ratio (top) and cumulative selectivity ratio (bottom) for epoxidation of ethyl benzoate vs.  $\text{Sn}(\text{TPP})(\text{OCOC}_6\text{H}_4\text{-}p\text{-CH=CH}_2)_2$  by **1** and **L**.

**Table S1** Crystal data and structure refinement for **1**.

|                                                               |                                                                                      |
|---------------------------------------------------------------|--------------------------------------------------------------------------------------|
| empirical formula                                             | C <sub>96</sub> H <sub>144</sub> ClMnN <sub>14</sub> O <sub>28</sub> Zn <sub>2</sub> |
| Fw                                                            | 2163.38                                                                              |
| T                                                             | 153(2) K                                                                             |
| crystal system                                                | Triclinic                                                                            |
| space group                                                   | P1                                                                                   |
| <i>a</i> , Å                                                  | 15.1376(18)                                                                          |
| <i>b</i> , Å                                                  | 15.2092(18)                                                                          |
| <i>c</i> , Å                                                  | 26.300(3)                                                                            |
| $\alpha$ , °                                                  | 73.271(2)                                                                            |
| $\beta$ , °                                                   | 77.508(2)                                                                            |
| $\gamma$ , °                                                  | 82.596(2)                                                                            |
| <i>V</i> , Å <sup>3</sup>                                     | 5647.2(12)                                                                           |
| <i>Z</i>                                                      | 2                                                                                    |
| crystal size                                                  | 0.33 x 0.30 x 0.22 mm                                                                |
| $\rho_{\text{calc}}$ , Mg/m <sup>3</sup>                      | 1.272                                                                                |
| $\mu$ , mm <sup>-1</sup>                                      | 0.630                                                                                |
| <i>F</i> (000)                                                | 2288                                                                                 |
| reflns collected                                              | 51451                                                                                |
| reflns unique                                                 | 44994                                                                                |
| <i>R</i> <sub>int</sub>                                       | 0.0515                                                                               |
| Flack parameter                                               | 0.00(3)                                                                              |
| GOF                                                           | 0.798                                                                                |
| <i>R</i> 1/ <i>wR</i> 2 [ <i>I</i> > 2 $\sigma$ ( <i>I</i> )] | 0.0634/0.1390                                                                        |
| <i>R</i> 1/ <i>wR</i> 2 (all data)                            | 0.1258/0.1535                                                                        |
| Largest diff. peak and hole                                   | 0.848 and -0.504                                                                     |

**Table S2** Selected bond lengths [Å] and angles [deg] for cavity.

|            |             |            |             |
|------------|-------------|------------|-------------|
| Zn1-N4     | 1.9666 (17) | Zn1-O7#1   | 2.0070 (13) |
| Zn1-O2     | 2.0306 (14) | Zn1-O5     | 2.0782 (13) |
| Zn1-O4#2   | 2.0956 (13) | Zn1-Zn2    | 2.9721 (5)  |
| Zn2-O8#1   | 2.0216 (13) | Zn2-O6     | 2.0287 (13) |
| Zn2-N1#3   | 2.0758 (16) | Zn2-O3#2   | 2.0849 (15) |
| Zn2-O1     | 2.0913 (13) | Zn3-O108#4 | 1.9948 (16) |
| Zn3-N101   | 2.0030 (18) | Zn3-O101   | 2.0179 (15) |
| Zn3-O106   | 2.0311 (17) | Zn3-O103#1 | 2.0506 (14) |
| Zn3-Zn4    | 2.9677 (5)  | Zn4-O104#1 | 1.9691 (16) |
| Zn4-O105   | 2.0459 (15) | Zn4-N104#3 | 2.0529 (15) |
| Zn4-O107#4 | 2.0630 (14) | Zn4-O102   | 2.0763 (13) |
| Mn1-Mn10   | 0.8120 (11) | Mn1-Cl1    | 1.352 (3)   |
| Mn1-O10    | 1.9065 (19) | Mn1-O9     | 1.973 (2)   |
| Mn1-N3     | 2.1129 (18) | Mn1-N2     | 2.133 (2)   |
| Mn10-Cl1   | 0.593 (3)   | Mn10-O10   | 1.947 (2)   |
| Mn10-O9    | 1.9880 (17) | Mn10-N3    | 1.999 (2)   |
| Mn10-N2    | 1.999 (2)   | Mn10-Cl10  | 2.408 (4)   |
| Mn2-O109   | 1.891 (2)   | Mn2-O110   | 1.952 (2)   |
| Mn2-N102   | 2.026 (2)   | Mn2-N103   | 2.0386 (18) |
| Mn2-Cl2    | 2.0849 (17) | Cl1-Cl10   | 1.882 (4)   |
| Cl1-O9     | 1.912 (2)   | Cl1-O10    | 2.067 (4)   |
| O1-C1      | 1.225 (2)   | O2-C1      | 1.321 (3)   |
| O3-C14     | 1.275 (3)   | O3-Zn2#4   | 2.0849 (15) |
| O4-C14     | 1.210 (2)   | O4-Zn1#4   | 2.0956 (13) |
| O5-C15     | 1.288 (2)   | O6-C15     | 1.289 (2)   |
| O7-C28     | 1.239 (2)   | O7-Zn1#5   | 2.0070 (13) |
| O8-C28     | 1.219 (3)   | O8-Zn2#5   | 2.0216 (13) |
| O9-C37     | 1.250 (3)   | O10-C57    | 1.279 (3)   |
| O101-C101  | 1.328 (3)   | O102-C101  | 1.270 (2)   |

|           |             |            |             |
|-----------|-------------|------------|-------------|
| O103-C114 | 1.215 (2)   | O103-Zn3#5 | 2.0506 (14) |
| O104-C114 | 1.264 (3)   | O104-Zn4#5 | 1.9691 (16) |
| O105-C115 | 1.223 (3)   | O106-C115  | 1.250 (2)   |
| O107-C128 | 1.261 (2)   | O107-Zn4#2 | 2.0630 (14) |
| O108-C128 | 1.233 (3)   | O108-Zn3#2 | 1.9948 (16) |
| O109-C137 | 1.398 (4)   | O110-C157  | 1.322 (3)   |
| N1-C33    | 1.333 (3)   | N1-C29     | 1.400 (3)   |
| N1-Zn2#6  | 2.0758 (16) | N2-C40     | 1.278 (3)   |
| N2-C45    | 1.447 (3)   | N3-C51     | 1.280 (3)   |
| N3-C46    | 1.510 (3)   | N4-C64     | 1.257 (3)   |
| N4-C65    | 1.336 (3)   | N101-C129  | 1.243 (3)   |
| N101-C133 | 1.332 (3)   | N102-C140  | 1.337 (3)   |
| N102-C145 | 1.456 (3)   | N103-C151  | 1.347 (4)   |
| N103-C146 | 1.379 (3)   | N104-C165  | 1.323 (3)   |
| N104-C164 | 1.405 (3)   | N104-Zn4#6 | 2.0529 (15) |
| C1-C2     | 1.466 (3)   | C2-C3      | 1.317 (3)   |
| C2-C7     | 1.350 (3)   | C3-C4      | 1.494 (3)   |
| C4-C5     | 1.338 (3)   | C5-C6      | 1.437 (3)   |
| C5-C8     | 1.462 (3)   | C6-C7      | 1.339 (3)   |
| C8-C9     | 1.380 (3)   | C8-C13     | 1.473 (3)   |
| C9-C10    | 1.334 (3)   | C10-C11    | 1.410 (3)   |
| C11-C12   | 1.354 (3)   | C11-C14    | 1.478 (3)   |
| C12-C13   | 1.482 (3)   | C15-C16    | 1.477 (3)   |
| C16-C17   | 1.282 (3)   | C16-C21    | 1.399 (3)   |
| C17-C18   | 1.448 (3)   | C18-C19    | 1.389 (3)   |
| C19-C20   | 1.284 (3)   | C19-C22    | 1.392 (3)   |
| C20-C21   | 1.478 (3)   | C22-C27    | 1.329 (3)   |
| C22-C23   | 1.402 (3)   | C23-C24    | 1.433 (3)   |
| C24-C25   | 1.370 (3)   | C25-C26    | 1.375 (3)   |
| C25-C28   | 1.586 (3)   | C26-C27    | 1.299 (3)   |
| C29-C30   | 1.480 (3)   | C30-C31    | 1.375 (3)   |
| C31-C32   | 1.333 (3)   | C31-C34    | 1.449 (3)   |
| C32-C33   | 1.421 (4)   | C34-C39    | 1.355 (3)   |
| C34-C35   | 1.405 (3)   | C35-C36    | 1.508 (4)   |
| C36-C37   | 1.339 (4)   | C36-C40    | 1.547 (3)   |
| C37-C38   | 1.517 (3)   | C38-C39    | 1.365 (4)   |
| C38-C41   | 1.580 (4)   | C41-C44    | 1.410 (4)   |
| C41-C42   | 1.540 (5)   | C41-C43    | 1.586 (3)   |
| C45-C46   | 1.440 (5)   | C45-C50    | 1.541 (3)   |
| C46-C47   | 1.443 (3)   | C47-C48    | 1.614 (4)   |
| C48-C49   | 1.513 (5)   | C49-C50    | 1.474 (3)   |
| C51-C52   | 1.443 (4)   | C52-C53    | 1.472 (3)   |
| C52-C57   | 1.497 (3)   | C53-C54    | 1.439 (3)   |
| C54-C62   | 1.417 (3)   | C54-C55    | 1.475 (3)   |
| C55-C56   | 1.329 (3)   | C56-C57    | 1.397 (4)   |
| C56-C58   | 1.540 (3)   | C58-C61    | 1.389 (4)   |
| C58-C60   | 1.401 (5)   | C58-C59    | 1.442 (5)   |
| C62-C66   | 1.333 (3)   | C62-C63    | 1.417 (3)   |
| C63-C64   | 1.444 (3)   | C65-C66    | 1.371 (3)   |
| C101-C102 | 1.422 (3)   | C102-C107  | 1.388 (3)   |
| C102-C103 | 1.436 (3)   | C103-C104  | 1.332 (3)   |
| C104-C105 | 1.418 (3)   | C105-C106  | 1.481 (3)   |
| C105-C108 | 1.547 (3)   | C106-C107  | 1.461 (3)   |
| C108-C113 | 1.411 (3)   | C108-C109  | 1.411 (3)   |
| C109-C110 | 1.368 (3)   | C110-C111  | 1.433 (3)   |
| C111-C112 | 1.378 (3)   | C111-C114  | 1.539 (3)   |
| C112-C113 | 1.335 (3)   | C115-C116  | 1.512 (3)   |
| C116-C117 | 1.422 (3)   | C116-C121  | 1.459 (3)   |
| C117-C118 | 1.316 (3)   | C118-C119  | 1.317 (3)   |
| C119-C120 | 1.326 (4)   | C119-C122  | 1.549 (3)   |
| C120-C121 | 1.422 (3)   | C122-C127  | 1.256 (3)   |
| C122-C123 | 1.450 (3)   | C123-C124  | 1.415 (4)   |
| C124-C125 | 1.331 (3)   | C125-C126  | 1.358 (4)   |
| C125-C128 | 1.585 (3)   | 126-C127   | 1.249 (4)   |
| C129-C130 | 1.375 (3)   | C130-C131  | 1.339 (4)   |

|                   |            |                 |             |
|-------------------|------------|-----------------|-------------|
| C131-C132         | 1.488 (4)  | C131-C134       | 1.506 (4)   |
| C132-C133         | 1.335 (4)  | C134-C135       | 1.334 (4)   |
| C134-C139         | 1.563 (4)  | C135-C136       | 1.347 (4)   |
| C136-C140         | 1.390 (3)  | C136-C137       | 1.446 (4)   |
| C137-C138         | 1.462 (4)  | C138-C139       | 1.349 (4)   |
| C138-C141         | 1.583 (5)  | C141-C144       | 1.369 (7)   |
| C141-C143         | 1.517 (5)  | C141-C142       | 1.654 (5)   |
| C145-C146         | 1.408 (3)  | C145-C150       | 1.667 (5)   |
| C146-C147         | 1.585 (3)  | C147-C148       | 1.469 (4)   |
| C148-C149         | 1.459 (4)  | C149-C150       | 1.533 (4)   |
| C151-C152         | 1.442 (4)  | C152-C153       | 1.341 (3)   |
| C152-C157         | 1.343 (3)  | C153-C154       | 1.326 (4)   |
| C154-C155         | 1.365 (3)  | C154-C162       | 1.553 (3)   |
| C155-C156         | 1.399 (4)  | C156-C157       | 1.456 (4)   |
| C156-C158         | 1.688 (4)  | C158-C160       | 1.322 (6)   |
| C158-C161         | 1.638 (9)  | C158-C159       | 1.716 (5)   |
| C162-C163         | 1.383 (3)  | C162-C166       | 1.385 (3)   |
| C163-C164         | 1.391 (3)  | C165-C166       | 1.396 (3)   |
|                   |            |                 |             |
| N4-Zn1-O7#1       | 102.05 (6) | N4-Zn1-O2       | 105.23 (6)  |
| O7#1-Zn1-O2       | 88.00 (6)  | N4-Zn1-O5       | 105.44 (6)  |
| O7#1-Zn1-O5       | 152.36 (5) | O2-Zn1-O5       | 87.55 (6)   |
| N4-Zn1-O4#2       | 96.14 (6)  | O7#1-Zn1-O4#2   | 88.42 (5)   |
| O2-Zn1-O4#2       | 158.61 (5) | O5-Zn1-O4#2     | 85.90 (6)   |
| N4-Zn1-Zn2        | 166.98 (5) | O7#1-Zn1-Zn2    | 68.58 (4)   |
| O2-Zn1-Zn2        | 83.95 (4)  | O5-Zn1-Zn2      | 83.83 (4)   |
| O4#2-Zn1-Zn2      | 75.11 (4)  | O8#1-Zn2-O6     | 162.71 (6)  |
| O8#1-Zn2-N1#3     | 102.98 (6) | O6-Zn2-N1#3     | 94.27 (6)   |
| O8#1-Zn2-O3#2     | 89.01 (6)  | O6-Zn2-O3#2     | 85.19 (6)   |
| N1#3-Zn2-O3#2     | 105.57 (6) | O8#1-Zn2-O1     | 91.01 (6)   |
| O6-Zn2-O1         | 88.15 (5)  | N1#3-Zn2-O1     | 96.56 (6)   |
| O3#2-Zn2-O1       | 157.28 (5) | O8#1-Zn2-Zn1    | 88.27 (4)   |
| O6-Zn2-Zn1        | 74.86 (4)  | N1#3-Zn2-Zn1    | 165.86 (5)  |
| O3#2-Zn2-Zn1      | 82.85 (4)  | O1-Zn2-Zn1      | 74.44 (4)   |
| O108#4-Zn3-N101   | 108.81 (6) | O108#4-Zn3-O101 | 87.26 (6)   |
| N101-Zn3-O101     | 101.48 (6) | O108#4-Zn3-O106 | 153.99 (6)  |
| N101-Zn3-O106     | 97.05 (7)  | O101-Zn3-O106   | 90.35 (6)   |
| O108#4-Zn3-O103#1 | 89.38 (6)  | N101-Zn3-O103#1 | 96.86 (6)   |
| O101-Zn3-O103#1   | 161.46 (6) | O106-Zn3-O103#1 | 84.71 (6)   |
| O108#4-Zn3-Zn4    | 80.93 (4)  | N101-Zn3-Zn4    | 166.00 (5)  |
| O101-Zn3-Zn4      | 88.76 (4)  | O106-Zn3-Zn4    | 73.12 (4)   |
| O103#1-Zn3-Zn4    | 72.71 (4)  | O104#1-Zn4-O105 | 86.68 (6)   |
| O104#1-Zn4-N104#3 | 104.30 (6) | O105-Zn4-N104#3 | 103.85 (6)  |
| O104#1-Zn4-O107#4 | 89.49 (6)  | O105-Zn4-O107#4 | 161.32 (6)  |
| N104#3-Zn4-O107#4 | 94.82 (6)  | O104#1-Zn4-O102 | 156.35 (6)  |
| O105-Zn4-O102     | 88.96 (6)  | N104#3-Zn4-O102 | 99.31 (6)   |
| O107#4-Zn4-O102   | 87.25 (6)  | O104#1-Zn4-Zn3  | 84.69 (4)   |
| O105-Zn4-Zn3      | 84.52 (4)  | N104#3-Zn4-Zn3  | 167.88 (5)  |
| O107#4-Zn4-Zn3    | 76.92 (4)  | O102-Zn4-Zn3    | 71.75 (4)   |
| Mn10-Mn1-Cl1      | 13.36 (11) | Mn10-Mn1-O10    | 80.68 (10)  |
| Cl1-Mn1-O10       | 76.66 (13) | Mn10-Mn1-O9     | 79.23 (10)  |
| Cl1-Mn1-O9        | 67.23 (11) | O10-Mn1-O9      | 94.66 (8)   |
| Mn10-Mn1-N3       | 70.81 (9)  | Cl1-Mn1-N3      | 83.58 (11)  |
| O10-Mn1-N3        | 87.81 (7)  | O9-Mn1-N3       | 149.14 (10) |
| Mn10-Mn1-N2       | 69.48 (10) | Cl1-Mn1-N2      | 75.74 (13)  |
| O10-Mn1-N2        | 149.33 (9) | O9-Mn1-N2       | 86.80 (9)   |
| N3-Mn1-N2         | 76.10 (8)  | Cl1-Mn10-Mn1    | 148.2 (2)   |
| Cl1-Mn10-O10      | 93.2 (3)   | Mn1-Mn10-O10    | 75.02 (10)  |
| Cl1-Mn10-O9       | 74.0 (2)   | Mn1-Mn10-O9     | 77.11 (9)   |
| O10-Mn10-O9       | 92.91 (8)  | Cl1-Mn10-N3     | 123.5 (2)   |
| Mn1-Mn10-N3       | 86.63 (10) | O10-Mn10-N3     | 90.01 (9)   |
| O9-Mn10-N3        | 162.10 (9) | Cl1-Mn10-N2     | 104.9 (3)   |
| Mn1-Mn10-N2       | 88.16 (10) | O10-Mn10-N2     | 161.73 (10) |
| O9-Mn10-N2        | 90.18 (8)  | 3-Mn10-N2       | 81.78 (9)   |
| Cl1-Mn10-Cl10     | 23.8 (2)   | Mn1-Mn10-Cl10   | 170.19 (13) |

|                 |             |                 |             |
|-----------------|-------------|-----------------|-------------|
| O10-Mn10-Cl10   | 97.48 (12)  | O9-Mn10-Cl10    | 97.25 (12)  |
| N3-Mn10-Cl10    | 99.87 (11)  | N2-Mn10-Cl10    | 99.99 (13)  |
| O109-Mn2-O110   | 91.88 (9)   | O109-Mn2-N102   | 93.56 (9)   |
| O110-Mn2-N102   | 169.01 (8)  | O109-Mn2-N103   | 157.25 (11) |
| O110-Mn2-N103   | 92.89 (8)   | N102-Mn2-N103   | 78.50 (8)   |
| O109-Mn2-Cl2    | 94.53 (9)   | O110-Mn2-Cl2    | 94.36 (8)   |
| N102-Mn2-Cl2    | 94.72 (7)   | N103-Mn2-Cl2    | 107.26 (8)  |
| Mn10-Cl1-Mn1    | 18.47 (15)  | Mn10-Cl1-Cl10   | 148.8 (3)   |
| Mn1-Cl1-Cl10    | 166.4 (2)   | Mn10-Cl1-O9     | 88.6 (2)    |
| Mn1-Cl1-O9      | 72.07 (11)  | Cl10-Cl1-O9     | 121.56 (19) |
| Mn10-Cl1-O10    | 70.1 (3)    | Mn1-Cl1-O10     | 63.81 (13)  |
| Cl10-Cl1-O10    | 112.68 (18) | O9-Cl1-O10      | 91.52 (13)  |
| Cl1-Cl10-Mn10   | 7.31 (8)    | C1-O1-Zn2       | 135.11 (15) |
| C1-O2-Zn1       | 122.12 (11) | C14-O3-Zn2#4    | 120.03 (12) |
| C14-O4-Zn1#4    | 130.16 (14) | C15-O5-Zn1      | 119.60 (11) |
| C15-O6-Zn2      | 133.40 (12) | C28-O7-Zn1#5    | 140.72 (15) |
| C28-O8-Zn2#5    | 113.46 (12) | C37-O9-Cl1      | 129.55 (19) |
| C37-O9-Mn1      | 126.88 (16) | Cl1-O9-Mn1      | 40.70 (9)   |
| C37-O9-Mn10     | 128.95 (16) | Cl1-O9-Mn10     | 17.34 (8)   |
| Mn1-O9-Mn10     | 23.66 (4)   | C57-O10-Mn1     | 138.17 (17) |
| C57-O10-Mn10    | 130.76 (17) | Mn1-O10-Mn10    | 24.30 (4)   |
| C57-O10-Cl1     | 129.08 (18) | Mn1-O10-Cl1     | 39.52 (8)   |
| Mn10-O10-Cl1    | 16.63 (7)   | C101-O101-Zn3   | 115.54 (12) |
| C101-O102-Zn4   | 136.45 (15) | C114-O103-Zn3#5 | 131.52 (14) |
| C114-O104-Zn4#5 | 119.56 (12) | C115-O105-Zn4   | 118.29 (12) |
| C115-O106-Zn3   | 134.10 (16) | C128-O107-Zn4#2 | 124.99 (14) |
| C128-O108-Zn3#2 | 124.11 (13) | C137-O109-Mn2   | 128.61 (17) |
| C157-O110-Mn2   | 124.72 (16) | C33-N1-C29      | 126.30 (18) |
| C33-N1-Zn2#6    | 118.04 (13) | C29-N1-Zn2#6    | 115.00 (13) |
| C40-N2-C45      | 119.6 (2)   | C40-N2-Mn10     | 127.69 (17) |
| C45-N2-Mn10     | 110.18 (15) | C40-N2-Mn1      | 123.78 (16) |
| C45-N2-Mn1      | 116.19 (17) | Mn10-N2-Mn1     | 22.36 (4)   |
| C51-N3-C46      | 119.8 (2)   | C51-N3-Mn10     | 126.18 (17) |
| C46-N3-Mn10     | 113.79 (17) | C51-N3-Mn1      | 124.14 (17) |
| C46-N3-Mn1      | 112.61 (14) | Mn10-N3-Mn1     | 22.56 (4)   |
| C64-N4-C65      | 111.6 (2)   | C64-N4-Zn1      | 125.14 (13) |
| C65-N4-Zn1      | 123.17 (16) | C129-N101-C133  | 110.9 (2)   |
| C129-N101-Zn3   | 125.12 (15) | C133-N101-Zn3   | 123.00 (14) |
| C140-N102-C145  | 126.5 (2)   | C140-N102-Mn2   | 123.44 (17) |
| C145-N102-Mn2   | 109.55 (17) | C151-N103-C146  | 125.3 (2)   |
| C151-N103-Mn2   | 119.84 (17) | C146-N103-Mn2   | 114.62 (16) |
| C165-N104-C164  | 121.42 (18) | C165-N104-Zn4#6 | 118.88 (15) |
| C164-N104-Zn4#6 | 119.31 (11) | O1-C1-O2        | 121.6 (2)   |
| O1-C1-C2        | 119.6 (2)   | O2-C1-C2        | 118.56 (16) |
| C3-C2-C7        | 120.4 (2)   | C3-C2-C1        | 115.51 (17) |
| C7-C2-C1        | 123.7 (2)   | C2-C3-C4        | 117.50 (18) |
| C5-C4-C3        | 120.9 (2)   | C4-C5-C6        | 118.3 (2)   |
| C4-C5-C8        | 119.8 (2)   | C6-C5-C8        | 121.90 (17) |
| C7-C6-C5        | 117.77 (19) | C6-C7-C2        | 124.9 (3)   |
| C9-C8-C5        | 123.38 (19) | C9-C8-C13       | 116.1 (2)   |
| C5-C8-Cl13      | 120.5 (2)   | C10-C9-C8       | 124.62 (19) |
| C9-C10-C11      | 120.7 (2)   | C12-C11-C10     | 120.8 (2)   |
| C12-C11-C14     | 116.72 (17) | C10-C11-C14     | 122.22 (19) |
| C11-C12-C13     | 118.93 (19) | C8-C13-C12      | 118.4 (2)   |
| O4-C14-O3       | 127.3 (2)   | O4-C14-C11      | 119.83 (19) |
| O3-C14-C11      | 112.90 (16) | O5-C15-O6       | 123.95 (18) |
| O5-C15-C16      | 119.52 (16) | O6-C15-C16      | 116.42 (17) |
| C17-C16-C21     | 120.4 (2)   | C17-C16-C15     | 121.98 (19) |
| C21-C16-C15     | 117.39 (18) | C16-C17-C18     | 119.4 (2)   |
| C19-C18-C17     | 122.2 (2)   | C20-C19-C18     | 117.2 (2)   |
| C20-C19-C22     | 120.03 (19) | C18-C19-C22     | 122.8 (2)   |
| C19-C20-C21     | 122.2 (2)   | C16-C21-C20     | 118.0 (2)   |
| C27-C22-C19     | 126.2 (2)   | C27-C22-C23     | 114.5 (2)   |
| C19-C22-C23     | 119.04 (17) | C22-C23-C24     | 122.06 (19) |
| C25-C24-C23     | 117.0 (2)   | C24-C25-C26     | 118.4 (2)   |

|                |             |                |             |
|----------------|-------------|----------------|-------------|
| C24-C25-C28    | 119.46 (19) | C26-C25-C28    | 122.10 (16) |
| C27-C26-C25    | 122.18 (18) | C26-C27-C22    | 125.3 (2)   |
| O8-C28-O7      | 127.24 (19) | O8-C28-C25     | 116.19 (16) |
| O7-C28-C25     | 116.54 (18) | N1-C29-C30     | 111.77 (18) |
| C31-C30-C29    | 124.7 (2)   | C32-C31-C30    | 114.9 (2)   |
| C32-C31-C34    | 122.6 (2)   | C30-C31-C34    | 122.11 (19) |
| C31-C32-C33    | 125.7 (3)   | N1-C33-C32     | 115.5 (2)   |
| C39-C34-C35    | 121.1 (2)   | C39-C34-C31    | 120.35 (19) |
| C35-C34-C31    | 118.2 (2)   | C34-C35-C36    | 112.6 (2)   |
| C37-C36-C35    | 128.7 (2)   | C37-C36-C40    | 124.2 (2)   |
| C35-C36-C40    | 106.7 (2)   | O9-C37-C36     | 126.2 (2)   |
| O9-C37-C38     | 120.8 (2)   | C36-C37-C38    | 112.2 (2)   |
| C39-C38-C37    | 118.6 (2)   | C39-C38-C41    | 124.9 (2)   |
| C37-C38-C41    | 112.7 (2)   | C34-C39-C38    | 125.1 (2)   |
| N2-C40-C36     | 120.9 (2)   | C44-C41-C42    | 100.9 (3)   |
| C44-C41-C38    | 123.4 (3)   | C42-C41-C38    | 107.0 (3)   |
| C44-C41-C43    | 106.9 (3)   | C42-C41-C43    | 108.2 (2)   |
| C38-C41-C43    | 109.4 (2)   | C46-C45-N2     | 112.4 (2)   |
| C46-C45-C50    | 112.7 (2)   | N2-C45-C50     | 116.34 (18) |
| C45-C46-C47    | 122.8 (3)   | C45-C46-N3     | 108.2 (2)   |
| C47-C46-N3     | 117.8 (2)   | C46-C47-C48    | 107.6 (2)   |
| C49-C48-C47    | 110.1 (2)   | C50-C49-C48    | 115.2 (3)   |
| C49-C50-C45    | 111.2 (2)   | N3-C51-C52     | 122.3 (2)   |
| C51-C52-C53    | 112.9 (2)   | C51-C52-C57    | 128.7 (2)   |
| C53-C52-C57    | 118.3 (2)   | C54-C53-C52    | 119.72 (19) |
| C62-C54-C53    | 118.69 (18) | C62-C54-C55    | 124.2 (2)   |
| C53-C54-C55    | 116.7 (2)   | C56-C55-C54    | 124.1 (2)   |
| C55-C56-C57    | 122.0 (2)   | C55-C56-C58    | 119.9 (2)   |
| C57-C56-C58    | 117.9 (2)   | O10-C57-C56    | 125.7 (2)   |
| O10-C57-C52    | 114.6 (2)   | C56-C57-C52    | 118.6 (2)   |
| C61-C58-C60    | 103.2 (3)   | C61-C58-C59    | 101.6 (3)   |
| C60-C58-C59    | 105.4 (3)   | C61-C58-C56    | 118.0 (2)   |
| C60-C58-C56    | 111.6 (3)   | C59-C58-C56    | 115.5 (2)   |
| C66-C62-C63    | 112.2 (2)   | C66-C62-C54    | 124.80 (19) |
| C63-C62-C54    | 123.0 (2)   | C62-C63-C64    | 116.3 (2)   |
| N4-C64-C63     | 130.0 (2)   | N4-C65-C66     | 123.5 (2)   |
| C62-C66-C65    | 125.9 (2)   | O102-C101-O101 | 124.94 (19) |
| O102-C101-C102 | 115.97 (19) | O101-C101-C102 | 119.09 (17) |
| C107-C102-C101 | 117.69 (17) | C107-C102-C103 | 120.87 (19) |
| C101-C102-C103 | 121.4 (2)   | C104-C103-C102 | 121.6 (2)   |
| C103-C104-C105 | 120.57 (19) | C104-C105-C106 | 120.77 (19) |
| C104-C105-C108 | 123.59 (18) | C106-C105-C108 | 115.53 (19) |
| C107-C106-C105 | 115.77 (19) | C102-C107-C106 | 120.07 (18) |
| C113-C108-C109 | 120.5 (2)   | C113-C108-C105 | 121.24 (18) |
| C109-C108-C105 | 118.28 (18) | C110-C109-C108 | 117.10 (19) |
| C109-C110-C111 | 122.14 (19) | C112-C111-C110 | 118.2 (2)   |
| C112-C111-C114 | 122.05 (18) | C110-C111-C114 | 119.60 (16) |
| C113-C112-C111 | 121.3 (2)   | C112-C113-C108 | 120.8 (2)   |
| O103-C114-O104 | 127.3 (2)   | O103-C114-C111 | 115.12 (18) |
| O104-C114-C111 | 117.29 (16) | O105-C115-O106 | 127.3 (2)   |
| O105-C115-C116 | 117.94 (15) | O106-C115-C116 | 114.66 (19) |
| C117-C116-C121 | 115.21 (19) | C117-C116-C115 | 125.38 (16) |
| C121-C116-C115 | 118.95 (19) | C118-C117-C116 | 119.8 (2)   |
| C117-C118-C119 | 126.7 (3)   | C118-C119-C120 | 117.1 (2)   |
| C118-C119-C122 | 123.9 (2)   | C120-C119-C122 | 117.99 (19) |
| C119-C120-C121 | 123.2 (2)   | C120-C121-C116 | 116.9 (2)   |
| C127-C122-C123 | 118.1 (2)   | C127-C122-C119 | 125.0 (2)   |
| C123-C122-C119 | 116.90 (19) | C124-C123-C122 | 116.0 (2)   |
| C125-C124-C123 | 120.0 (2)   | C124-C125-C126 | 116.4 (2)   |
| C124-C125-C128 | 118.2 (2)   | C126-C125-C128 | 125.31 (19) |
| C127-C126-C125 | 124.9 (2)   | C126-C127-C122 | 123.7 (3)   |
| O108-C128-O107 | 128.3 (2)   | O108-C128-C125 | 117.45 (17) |
| O107-C128-C125 | 114.25 (19) | N101-C129-C130 | 131.6 (2)   |
| C131-C130-C129 | 115.9 (2)   | C130-C131-C132 | 116.8 (3)   |
| C130-C131-C134 | 121.7 (3)   | C132-C131-C134 | 121.4 (2)   |



|                |             |                |           |
|----------------|-------------|----------------|-----------|
| C133-C132-C131 | 113.3 (2)   | N101-C133-C132 | 129.5 (2) |
| C135-C134-C131 | 124.5 (3)   | C135-C134-C139 | 113.2 (3) |
| C131-C134-C139 | 122.1 (2)   | C134-C135-C136 | 127.6 (3) |
| C135-C136-C140 | 118.7 (2)   | C135-C136-C137 | 115.7 (2) |
| C140-C136-C137 | 125.6 (2)   | O109-C137-C136 | 121.4 (2) |
| O109-C137-C138 | 114.3 (2)   | C136-C137-C138 | 123.2 (3) |
| C139-C138-C137 | 111.3 (3)   | C139-C138-C141 | 114.5 (3) |
| C137-C138-C141 | 121.8 (3)   | C138-C139-C134 | 124.3 (2) |
| N102-C140-C136 | 126.9 (3)   | C144-C141-C143 | 99.7 (3)  |
| C144-C141-C138 | 116.9 (3)   | C143-C141-C138 | 111.6 (3) |
| C144-C141-C142 | 114.3 (3)   | C143-C141-C142 | 123.2 (3) |
| C138-C141-C142 | 92.3 (2)    | C146-C145-N102 | 109.1 (2) |
| C146-C145-C150 | 113.7 (2)   | N102-C145-C150 | 114.1 (2) |
| N103-C146-C145 | 109.1 (2)   | N103-C146-C147 | 120.5 (2) |
| C145-C146-C147 | 114.3 (2)   | C148-C147-C146 | 115.8 (2) |
| C149-C148-C147 | 111.3 (2)   | C148-C149-C150 | 116.7 (3) |
| C149-C150-C145 | 106.9 (3)   | N103-C151-C152 | 129.5 (2) |
| C153-C152-C157 | 121.7 (2)   | C153-C152-C151 | 117.1 (2) |
| C157-C152-C151 | 120.6 (2)   | C154-C153-C152 | 124.8 (2) |
| C153-C154-C155 | 115.7 (2)   | C153-C154-C162 | 125.7 (2) |
| C155-C154-C162 | 118.4 (2)   | C154-C155-C156 | 124.2 (3) |
| C155-C156-C157 | 115.7 (2)   | C155-C156-C158 | 128.9 (3) |
| C157-C156-C158 | 114.9 (3)   | O110-C157-C152 | 129.2 (2) |
| O110-C157-C156 | 113.2 (2)   | C152-C157-C156 | 117.6 (2) |
| C160-C158-C161 | 129.6 (5)   | C160-C158-C156 | 115.3 (4) |
| C161-C158-C156 | 99.3 (3)    | C160-C158-C159 | 116.1 (4) |
| C161-C158-C159 | 93.2 (3)    | C156-C158-C159 | 97.0 (3)  |
| C163-C162-C166 | 117.8 (2)   | C163-C162-C154 | 118.6 (2) |
| C166-C162-C154 | 123.17 (19) | C162-C163-C164 | 123.2 (2) |
| C163-C164-N104 | 116.24 (18) | N104-C165-C166 | 121.8 (2) |
| C162-C166-C165 | 119.2 (2)   |                |           |

Symmetry transformations used to generate equivalent atoms:

(#1)  $x-1, y, z$ ; (#2)  $x, y-1, z$ ; (#3)  $x, y, 1+z$ ; (#4)  $x, 1+y, z$ ; (#5)  $1+x, y, z$ ; (#6)  $x, y, z-1$ .

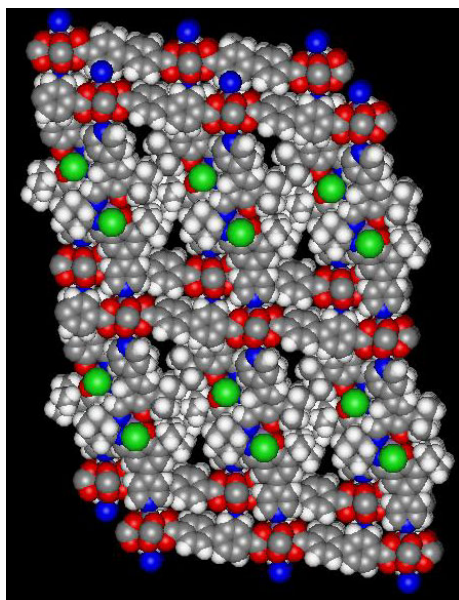

**Fig. S2** Space filling diagram of compound **1** viewed along the [010] direction, illustrating the blocking of channel openings by network interpenetration.

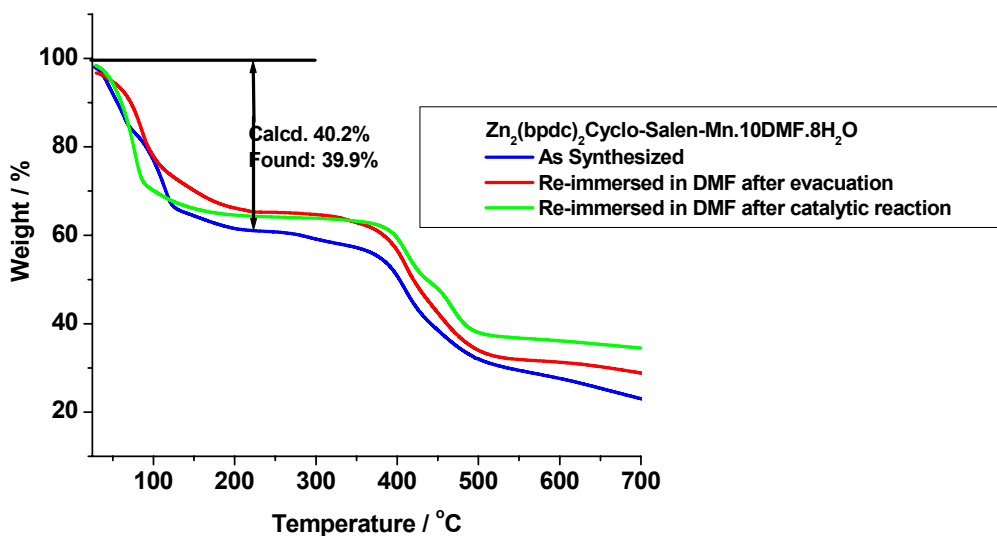

1

Fig. S3 TGA compound 1 under different conditions: freshly prepared sample (blue line); the sample immersed in DMF for 2 days after evacuation at 100 °C overnight (red line); the evacuated sample immersed in DMF for 2 days after catalytic reaction (green line).

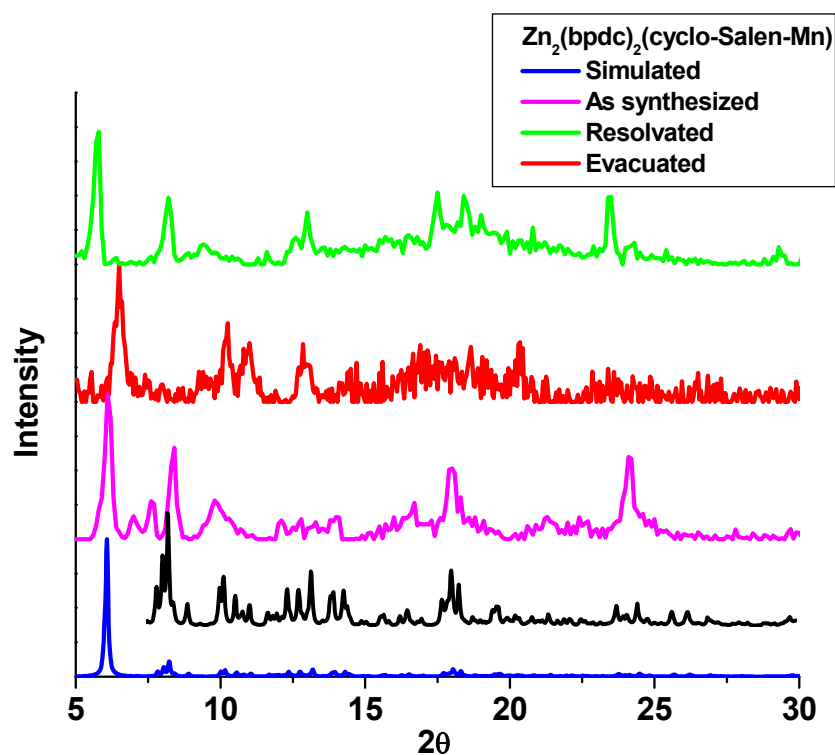

Fig. S4 XRD patterns for compound 1 (the black curve is a magnified version of the blue curve).

#### References

- 1 D. Macikenas, E. Skrzypczak-Jankun, and J. D. Protasiewicz, *J. Am. Chem. Soc.*, 1999, **121**, 7164-7165.
- 2 G. M. Strunz, D. Brillon, and P. Giguere, *Can. J. Chem.*, 1983, **61**, 1963-1964.
- 3 N. H. Lee, A. R. Muci, and E. N. Jacobsen, *Tetrahedron Lett.*, 1991, **32**, 5055-8.
- 4 G. A. Morris, S. T. Nguyen, J. T. Hupp, *J. Mol. Catal. A* **2001**, *174*, 15-20.
- 5 D. P. Arnold, *Polyhedron*, **1988**, *7*, 2225-2227.
- 6 R. Bock, *A Handbook of Decomposition Methods in Analytical Chemistry*, Wiley, New York, 1979, pp 196-204.
